# Supplementary material
Source: PubMed Central journal article supplement (PMC7653052)
Supplement: mmc1.pdf [file mmc1.pdf]

## SUPPLEMENTARY MATERIALS

**Box S1** Manipulation procedure for obtaining an extemporaneous LPV/r suspension.

### **Part I - Preparation of kit components in the hospital pharmacy**

The pharmacist should prepare the following components of the kit in the compounding laboratory of the hospital pharmacy. For the preparation of the syringe (**A**), it is necessary to operate under the hood (chemical hood UNI EN 14175 or vertical laminar flow hood) using the correct personal protective equipment (PPE).

**A.** 50-ml Luer-lock syringe containing the dose of the medicinal product to be given:

1. Crush the tablets finely in a mortar.
2. Weigh the exact amount of dose to be dosed.
3. Load the dosed powder in the syringe from the bottom after removing the plunger.
4. Insert the plunger and take it to the end of the ride without compacting the powder.
5. Plug the syringe with a stopper.
6. Label the syringe in the agreement of the Good Compounding Practice.

**B.** 50-mL Luer-lock syringe containing 20 mL of the suspension vehicle having the following composition:

- sodium carboxymethyl cellulose, 0.2 g
- trisodium citrate dihydrate, 0.26 g
- citric acid, 0.2 g
- water, to 20 mL.

### **Part II - Preparation of the extemporaneous oral antiretroviral suspension at the bedside**

The nurse/medical doctor receive a kit, including:

- A.** 50-ml Luer-lock syringe containing the drug dose patient needs.
- B.** 50-ml Luer-lock syringe containing suspending solution.
- C.** Sterile Female-Female Luer Lock Connector.

The nurse/medical doctor should prepare the extemporaneous suspension immediately before the administration as follow:

1. Connect the syringe **A** to syringe **B** by using the female-female Luer-lock connector **C**.
2. Transfer the content of syringe **B** in syringe **A**.
3. Repeat point 2 at least 50 times to mix the suspension or until all the powder is entirely and finely suspended (no aggregates are visually noted).
4. Administer the entire suspension volume to the patient.
5. Check the syringe for suspension residuals. Eventually, wash the syringe with a glucose solution to be given to the patient.

**Figure S1** Chromatograms of placebo and drug-loaded vehicles.

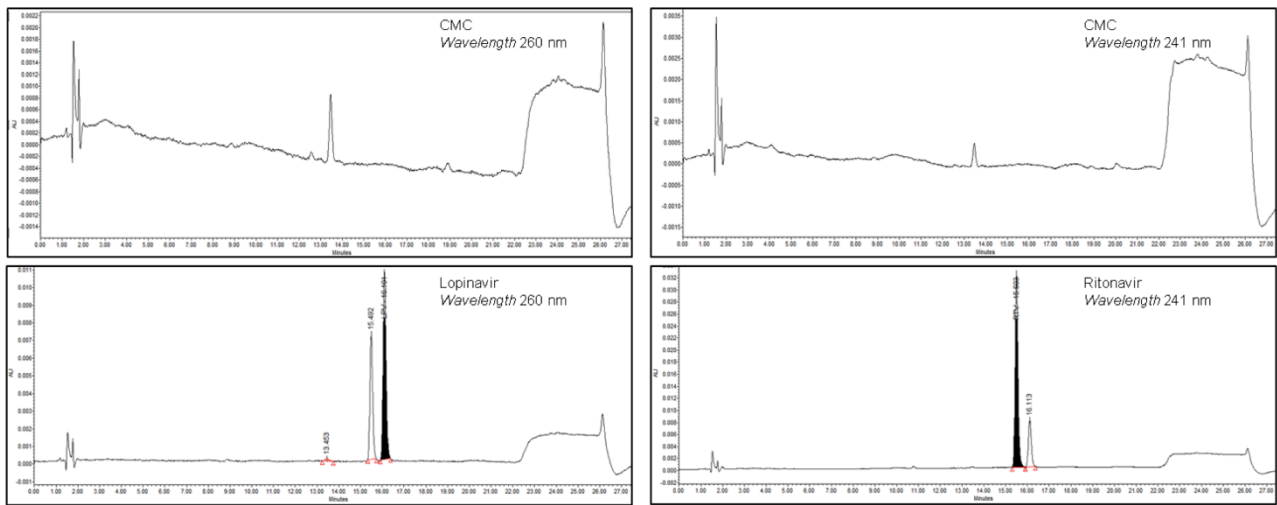

**Figure S2** Chromatograms of lopinavir/ritonavir suspension at room temperature after 1 and 15 days.

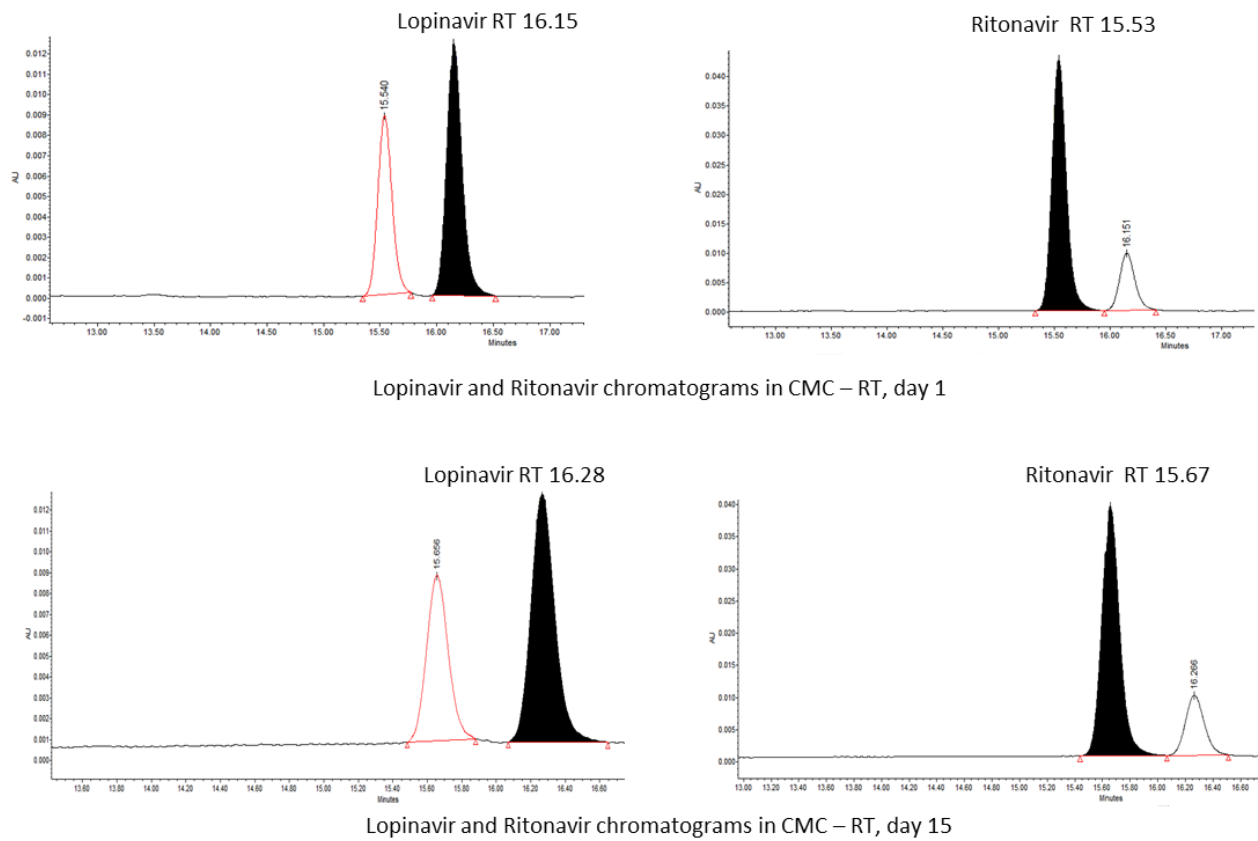

**Table S1** Summary of Area weighted cumulative distributions of LPV/r suspension at different times after preparation and after manual handshaking (HS).

| % of the total particle area | Particle size ( $\mu\text{m}$ ) |        |        |         |              |
|------------------------------|---------------------------------|--------|--------|---------|--------------|
|                              | 0                               | 30 min | 90 min | 180 min | 180 min + HS |
| 5                            | < 0.54                          | < 0.55 | < 0.59 | < 0.64  | < 0.57       |
| 10                           | < 0.58                          | < 0.60 | < 0.64 | < 0.79  | < 0.64       |
| 15                           | < 0.61                          | < 0.64 | < 0.71 | < 0.88  | < 0.67       |
| 20                           | < 0.64                          | < 0.67 | < 0.79 | < 0.98  | < 0.71       |
| 25                           | < 0.67                          | < 0.71 | < 0.83 | < 1.04  | < 0.79       |
| 30                           | < 0.71                          | < 0.75 | < 0.93 | < 1.12  | < 0.83       |
| 35                           | < 0.75                          | < 0.82 | < 0.98 | < 1.22  | < 0.88       |
| 40                           | < 0.80                          | < 0.85 | < 1.04 | < 1.29  | < 0.93       |
| 45                           | < 0.83                          | < 0.89 | < 1.09 | < 1.39  | < 0.96       |
| 50                           | < 0.88                          | < 0.93 | < 1.15 | < 1.51  | < 1.00       |
| 55                           | < 0.93                          | < 0.98 | < 1.27 | < 1.68  | < 1.04       |
| 60                           | < 0.95                          | < 1.04 | < 1.36 | < 1.88  | < 1.09       |
| 65                           | < 0.98                          | < 1.09 | < 1.60 | < 2.21  | < 1.15       |
| 70                           | < 1.04                          | < 1.15 | < 1.88 | < 2.69  | < 1.22       |
| 75                           | < 1.09                          | < 1.22 | < 2.46 | < 3.22  | < 1.29       |
| 80                           | < 1.15                          | < 1.30 | < 3.20 | < 3.78  | < 1.43       |
| 85                           | < 1.29                          | < 1.51 | < 3.78 | < 4.45  | < 1.80       |
| 90                           | < 1.68                          | < 2.33 | < 4.45 | < 5.52  | < 3.22       |
| 95                           | < 3.05                          | < 4.18 | < 5.51 | < 7.23  | < 4.69       |
| 99                           | < 4.79                          | < 4.96 | < 6.71 | < 8.97  | < 5.52       |
| Median                       | 0.88                            | 0.93   | 1.15   | 1.51    | 1.00         |
| Span                         | 1.25                            | 1.86   | 3.31   | 3.13    | 2.58         |

**Table S2** Raw data of analytical analyses of filtered suspension containing lopinavir and ritonavir.

| Storage condition   | Drug      | Time  | Retention time | Peak area |
|---------------------|-----------|-------|----------------|-----------|
| At room temperature | Lopinavir | 0     | 16.11          | 96100     |
|                     |           |       | 16.10          | 104381    |
|                     |           |       | 16.08          | 92974     |
|                     |           | 1     | 16.15          | 132810    |
|                     |           |       | 16.15          | 119491    |
|                     |           |       | 16.15          | 127986    |
|                     |           | 4     | 16.25          | 114300    |
|                     |           |       | 16.23          | 104271    |
|                     |           |       | 16.24          | 115522    |
|                     | 15        | 16.26 | 115580         |           |
|                     |           | 16.27 | 92950          |           |
|                     |           | 16.28 | 127399         |           |
|                     | Ritonavir | 0     | 15.50          | 292019    |
|                     |           |       | 15.49          | 314154    |
|                     |           |       | 15.47          | 281628    |
|                     |           | 1     | 15.53          | 431365    |
|                     |           |       | 15.54          | 386080    |
|                     |           |       | 15.54          | 406412    |
|                     |           | 4     | 15.59          | 343562    |
|                     |           |       | 15.58          | 314912    |
|                     |           |       | 15.59          | 346637    |
| 15                  |           | 15.65 | 353380         |           |
|                     |           | 15.66 | 294156         |           |
|                     |           | 15.67 | 376310         |           |
| At 4°C              | Lopinavir | 0     | 16.11          | 96100     |
|                     |           |       | 16.10          | 104381    |
|                     |           |       | 16.08          | 92974     |
|                     |           | 1     | 16.17          | 93851     |
|                     |           |       | 16.17          | 88714     |
|                     |           |       | 16.16          | 83902     |
|                     |           | 4     | 16.25          | 110524    |
|                     |           |       | 16.24          | 107702    |
|                     |           |       | 16.25          | 105979    |
|                     |           | 15    | 16.27          | 67995     |
|                     |           |       | 16.27          | 69525     |
|                     |           |       | 16.28          | 63369     |

|  |           |    |       |        |
|--|-----------|----|-------|--------|
|  | Ritonavir | 0  | 15.50 | 96100  |
|  |           |    | 15.49 | 104381 |
|  |           |    | 15.47 | 92974  |
|  |           | 1  | 15.55 | 284736 |
|  |           |    | 15.56 | 268107 |
|  |           |    | 15.55 | 255910 |
|  |           | 4  | 15.60 | 322363 |
|  |           |    | 15.60 | 327809 |
|  |           |    | 15.60 | 319944 |
|  |           | 15 | 15.66 | 214967 |
|  |           |    | 15.66 | 210706 |
|  |           |    | 15.67 | 203725 |
